# Supplementary material for: Cellulose-Enriched Microbial Communities from Leaf-Cutter Ant (Atta colombica) Refuse Dumps Vary in Taxonomic Composition and Degradation Ability
Source: PubMed Central journal article supplement (PMC4801328; doi:10.1371/journal.pone.0151840), 2016-03-21
Supplement: pone.0151840.s002.pdf [file pone.0151840.s002.pdf]

## S2 Fig

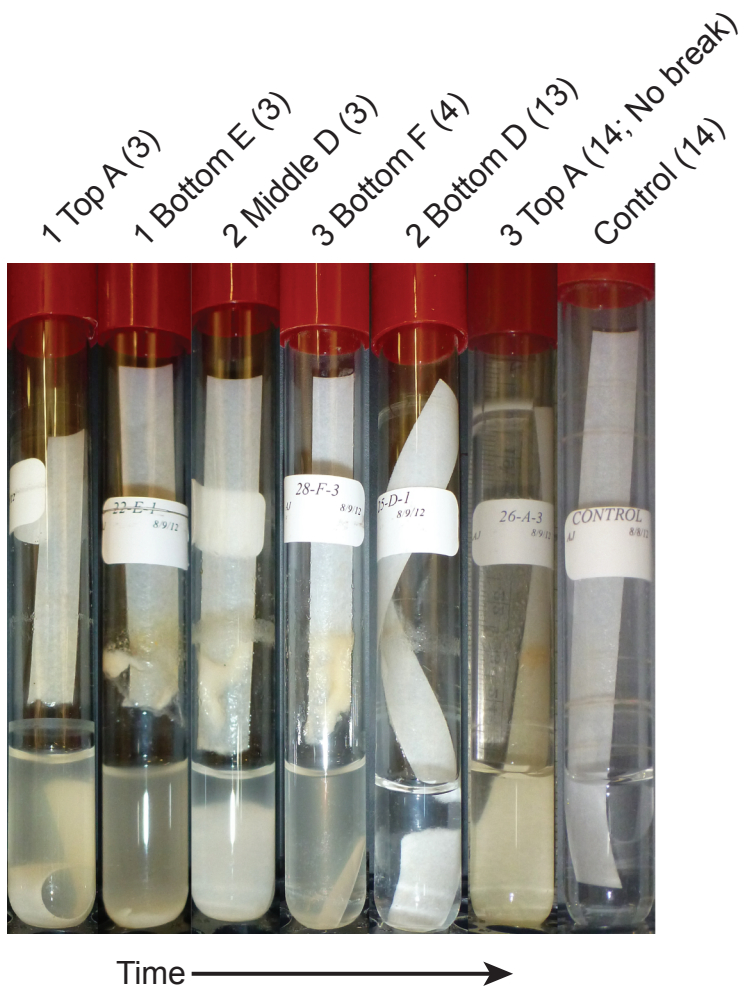

**S2 Fig. Representative qualitative samples.** Images were taken on the day the filter paper broke in half (indicated in parentheses after the sample name) for all cultures except for 3 Top A and the control, which were imaged on day 14.
