# Supplementary material for: Cellulose-Enriched Microbial Communities from Leaf-Cutter Ant (Atta colombica) Refuse Dumps Vary in Taxonomic Composition and Degradation Ability
Source: PubMed Central journal article supplement (PMC4801328; doi:10.1371/journal.pone.0151840), 2016-03-21
Supplement: pone.0151840.s003.pdf [file pone.0151840.s003.pdf]

# S3 Fig

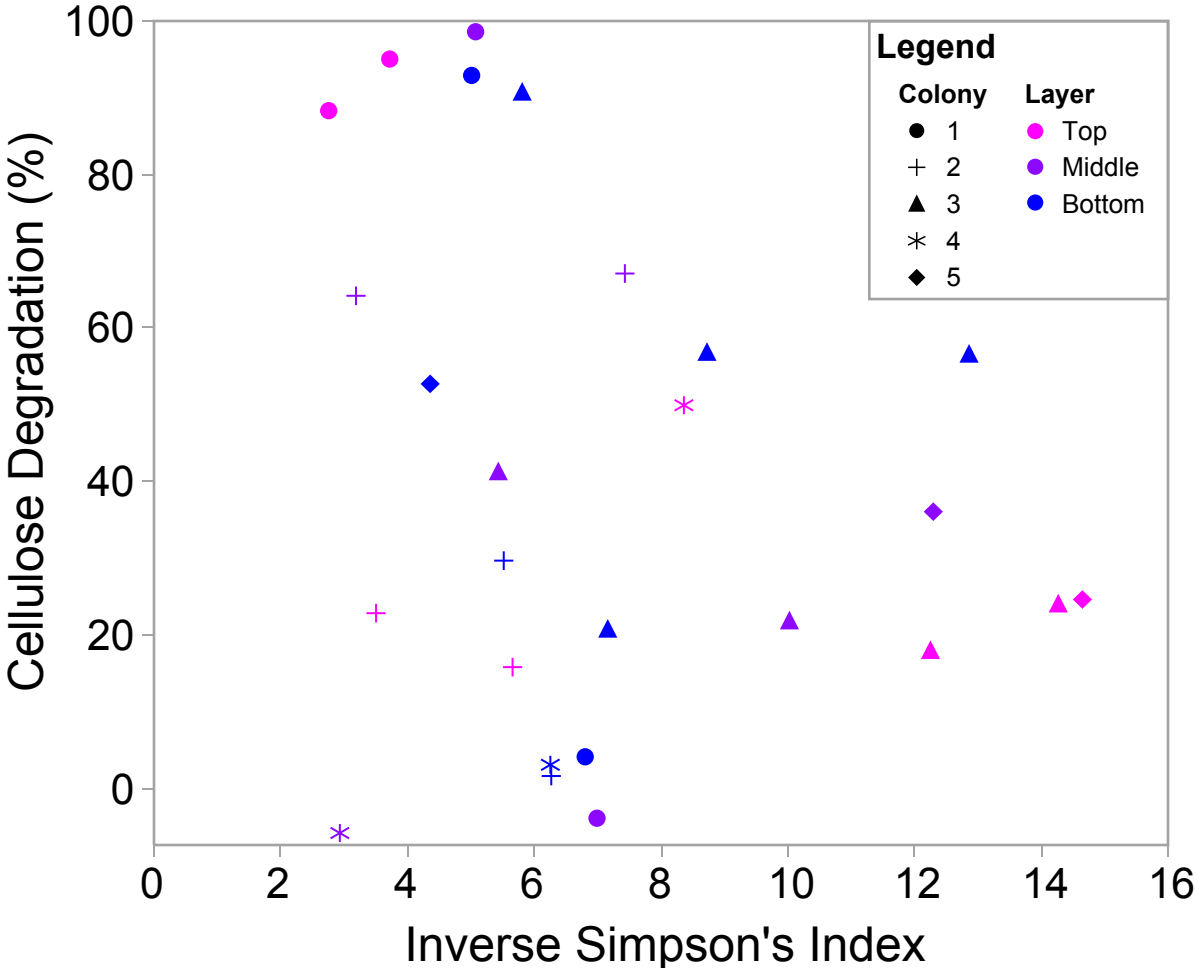

**S3 Fig. Relationship between the percentage of cellulose degraded and diversity (Inverse Simpson's Index) across sequenced samples. Sample shape indicates colony. Sample color indicates layer.**
