# Supplementary material for: Cellulose-Enriched Microbial Communities from Leaf-Cutter Ant (Atta colombica) Refuse Dumps Vary in Taxonomic Composition and Degradation Ability
Source: PubMed Central journal article supplement (PMC4801328; doi:10.1371/journal.pone.0151840), 2016-03-21
Supplement: pone.0151840.s005.pdf [file pone.0151840.s005.pdf]

# S5 Fig

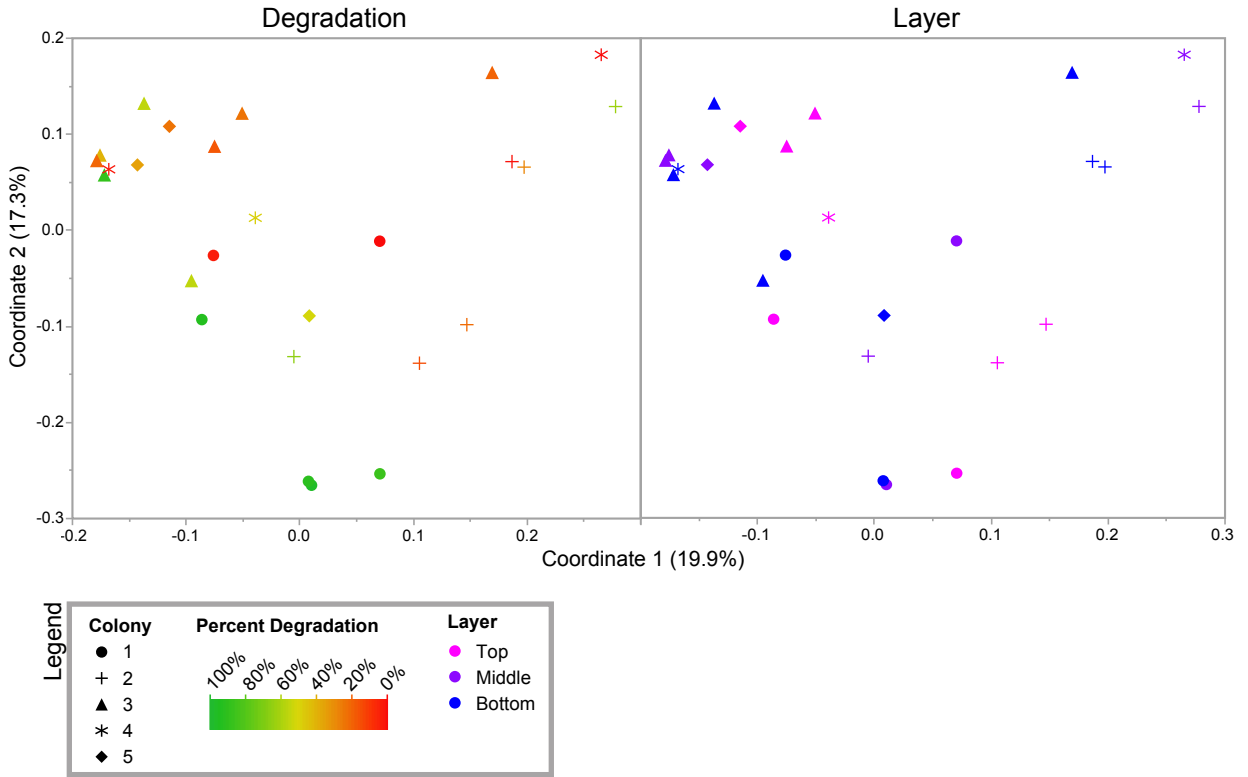

**S5 Fig. PCoA clustering of the weighted Unifrac metric of similarity among samples.** Sample shape indicates colony. Sample color indicates degradation (A) or layer (B).
